# Supplementary material for: On demand shape memory polymer via light regulated topological defects in a dynamic covalent network
Source: PubMed Central journal article supplement (PMC7450050; doi:10.1038/s41467-020-18116-1), 2020-08-26
Supplement: 41467_2020_18116_MOESM1_ESM.pdf [file 41467_2020_18116_MOESM1_ESM.pdf]

## **Supplementary Information**

### **On Demand Shape Memory Polymer via Light Regulated Topological Defects in a Dynamic Covalent Network**

**Miao et al.**

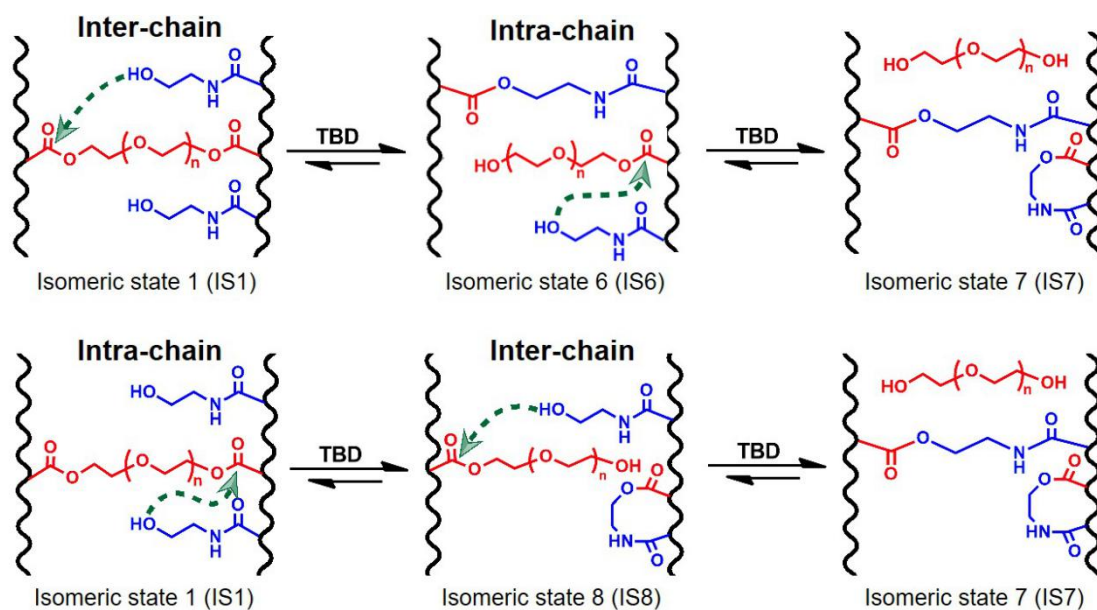

**Supplementary Figure 1** Network isomerization via the inter- and intra-chain transesterification in an intermixed fashion. Relative to the original isomeric state (IS1), the number of crosslinking points remain unchanged for IS6 and IS7 while IS8 decreases.

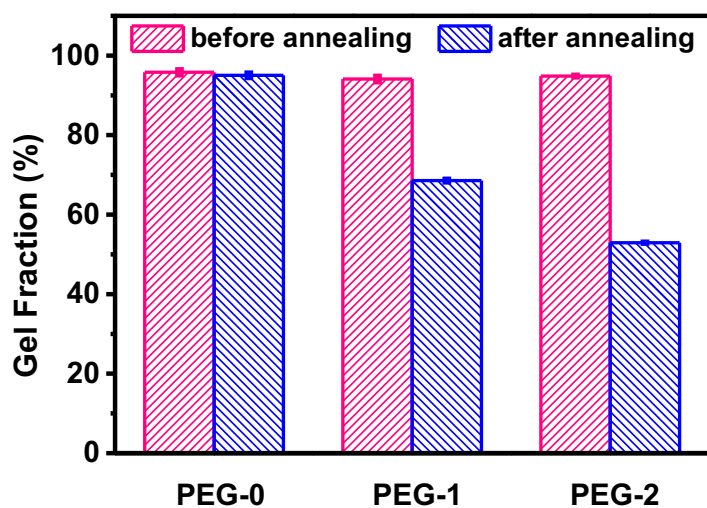

**Supplementary Figure 2** Gel fraction of PEG-0, PEG-1 and PEG-2 samples before and after thermal treatment. Error bars represent standard deviations calculated from three specimens.

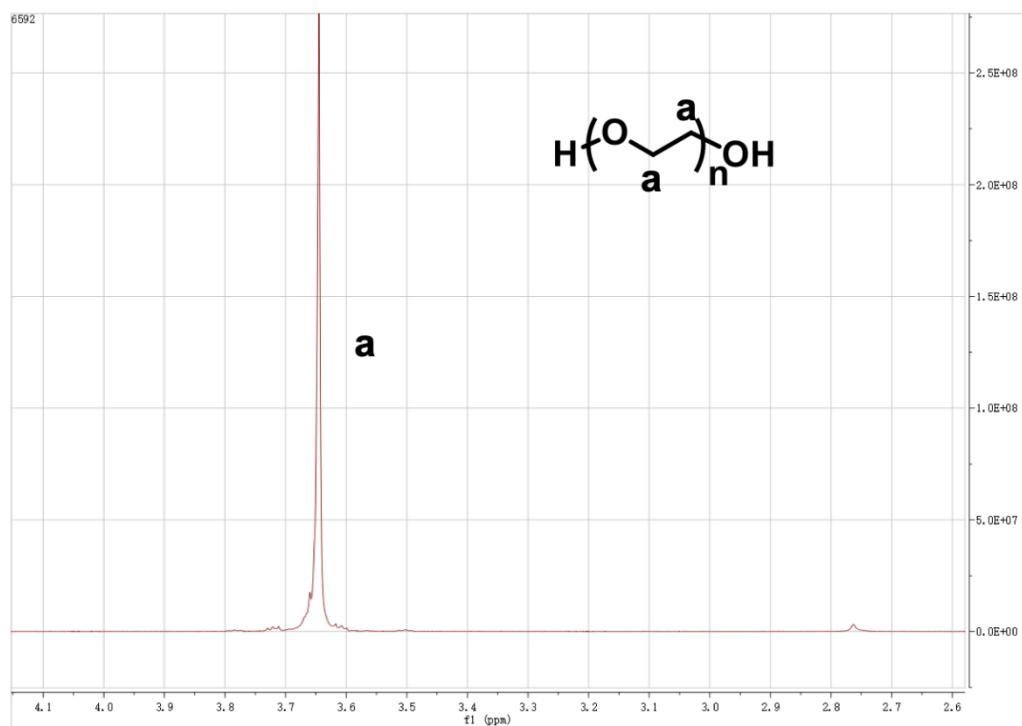

**Supplementary Figure 3** <sup>1</sup>H NMR spectra of PEG extracted from the thermally annealed PEG-2 samples. (All <sup>1</sup>H NMR analysis was recorded with Bruker Avance 500 (500 MHz) using CDCl<sub>3</sub> as the solvent)

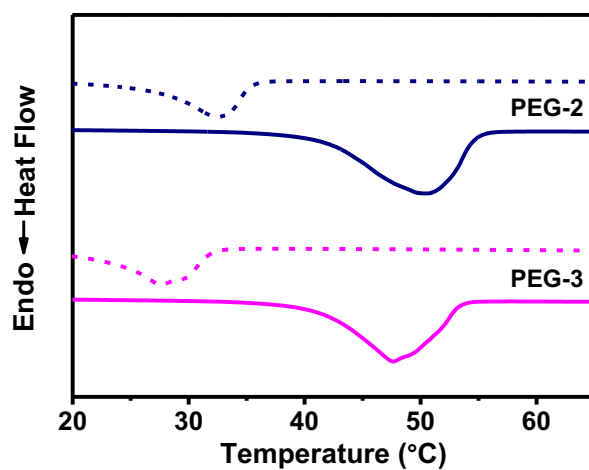

**Supplementary Figure 4** DSC curves of PEG-2 and PEG-3 before (dotted lines) and after (solid lines) isomerization.

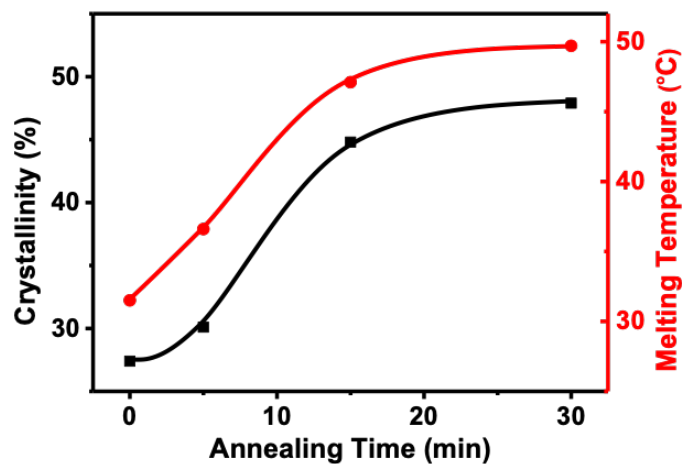

**Supplementary Figure 5** Kinetic studies of the PEG-2 isomerization (irradiation time: 300 s). The crystallinity and melting temperatures of the isomerized PEG-2 samples.

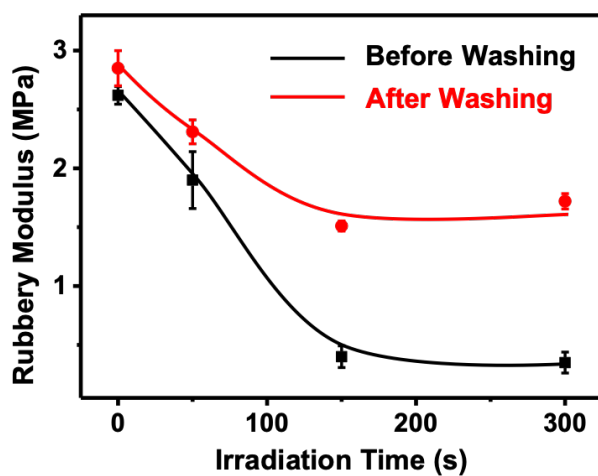

**Supplementary Figure 6** Rubbery moduli (80 °C) of the isomerized (washed) samples upon irradiation of different time. Error bars represent standard deviations calculated from three specimens.

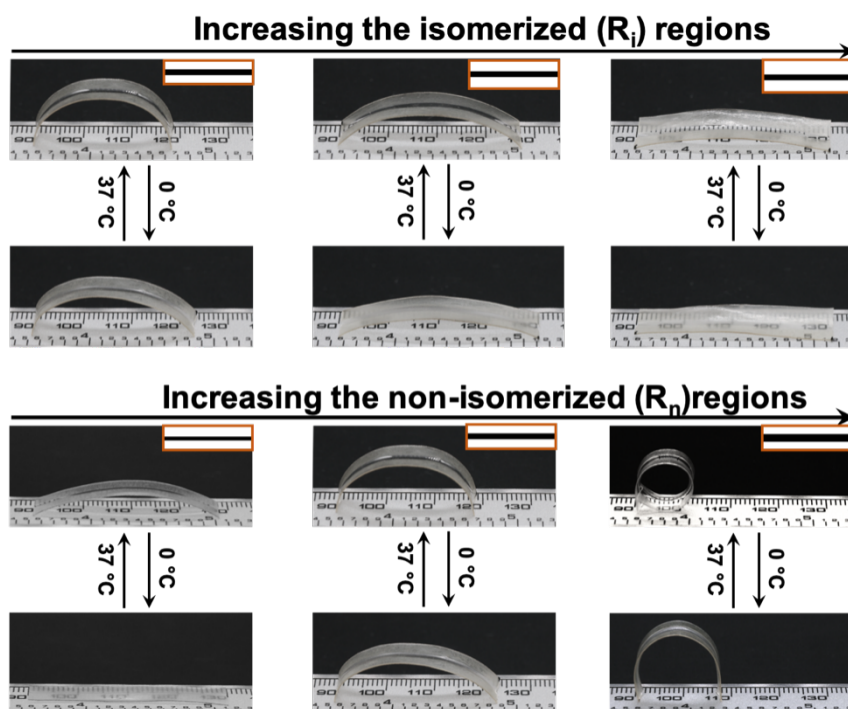

**Supplementary Figure 7.** Tunable bending curvature of reversible shape memory behavior (the corresponding light patterns shown as the insets, pre-stretching: 30 %).

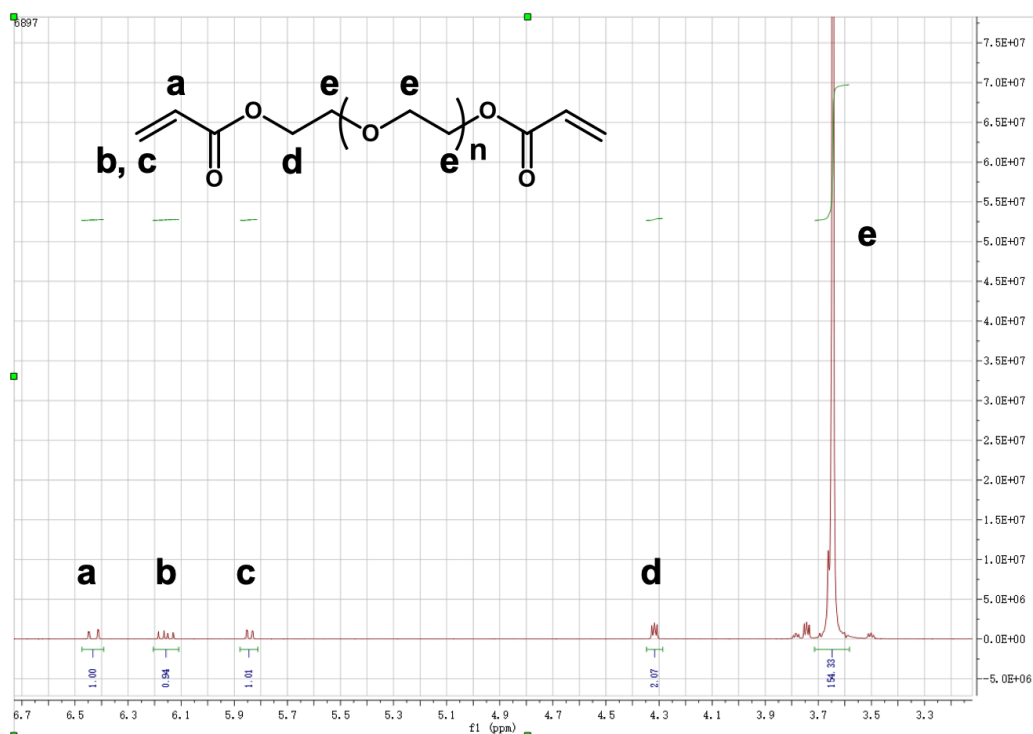

**Supplementary Figure 8**  $^1\text{H}$  NMR spectra of PEGDA.
